# Supplementary material
Source: Springer Nature journal article supplement (https://www.springermedizin.de/resource/supplementary/13014_2013_1250_MOESM6_ESM.pdf/9634624)
Supplement: MOESM6 [file 9634624]

# Table 1 Physical doses for nude mouse tumors

| Group   | $^{10}\text{B}$ concentration (ppm) | Physical dose (Gy) |
|---------|-------------------------------------|--------------------|
| N       | 0                                   | 4.59               |
| BPA+N   | 16.82 $\pm$ 6.23                    | 10.49 $\pm$ 2.18   |
| BPA+S+N | 22.72 $\pm$ 7.71                    | 12.55 $\pm$ 2.70   |
| BSH+N   | 3.18 $\pm$ 1.09                     | 5.70 $\pm$ 0.38    |
| BSH+S+N | 9.84 $\pm$ 7.53*                    | 8.04 $\pm$ 2.64*   |

N, neutron irradiation; BPA, intraperitoneal injection of BPA; S, sonoporation (ultrasound irradiation in the presence of microbubbles); BSH, intraperitoneal injection of BSH. Values except for N were means  $\pm$  SD of three to four determinations. \* $P < 0.05$  vs. BSH+N.
